# Supplementary material
Source: PubMed Central journal article supplement (PMC7781448)
Supplement: djaa076_supplementary_data.pdf [file djaa076_supplementary_data.pdf]

Tumor biomarker analyses in PURE-01:

DNA was extracted from formalin fixed paraffin embedded tissue obtained from pre-therapy TURB samples. Comprehensive genomic profiling (CGP) was performed in a Clinical Laboratory Improvement Amendments (CLIA)-certified, College of American Pathologists (CAP)-accredited laboratory (Foundation Medicine, Cambridge, MA). CGP was performed on hybridization-captured, adaptor ligation-based libraries to a median coverage depth of 743× for 395 cancer-related genes plus select introns from 31 genes frequently rearranged in cancer (Supplementary Material). Custom filtering was applied to remove benign germline events as described.[1,2] To determine microsatellite status, 114 intronic homopolymer repeat loci on the FoundationOne panel were analyzed for length variability and compiled into an overall microsatellite instability (MSI) score via principal components analysis. TMB was calculated as the number of somatic base substitutions or indels per megabase (Mb) of the coding region target territory of the test (1.1 Mb) after filtering to remove known somatic and deleterious mutations and extrapolating that value to the exome or genome as a whole.[2] For purposes of mutation burden estimation, all base substitutions and indels, including synonymous alterations, are counted. Subtracted from this number are functionally oncogenic or germline alterations, as defined below. Germline alterations are those listed in the dbSNP database (<http://www.ncbi.nlm.nih.gov/SNP>), those with two or more counts in the ExAC database (<http://exac.broadinstitute.org>), or those predicted by a somatic-germline zygosity algorithm to be germline in the specimen being assessed.[3] TMB is reported as mutations per megabase (mut/mB).

Microsatellite instability (MSI) was measured by evaluating the changes to 114 loci selected from a total set of 1,897 that have adequate coverage. In a large training set of data from clinical specimens, we then used principal components analysis (PCA) to project the 228-dimension data onto a single dimension (the first principal component) that maximizes the data separation, producing an NGS-based “MSI score”. [4]

PD-L1 expression was determined by IHC (Dako 22C3 PharmDx assay; Agilent Technologies, Carpinteria, CA, USA) at the local laboratory, with expressions scored using the CPS as previously described.[5,6] Approval for this study, including a waiver of informed consent and a HIPAA waiver

of authorization, was obtained from the Western Institutional Review Board (Protocol No. 20152817).

**References:**

1. Frampton GM, Fichtenholtz A, Otto GA, et al. Development and validation of a clinical cancer genomic profiling test based on massively parallel DNA sequencing. *Nat Biotechnol* 2013;31:1023–1031.
2. Chalmers ZR, Connelly CF, Fabrizio D, et al. Analysis of 100,000 human cancer genomes reveals the landscape of tumor mutational burden. *Genome Med*. 2017;9(1):34. doi:10.1186/s13073-017-0424-2.
3. Sun JX, Frampton G, Wang K, et al. Abstract 1893: A computational method for somatic versus germline variant status determination from targeted next-generation sequencing of clinical cancer specimens without a matched normal control. *Cancer Res*. 2014;74(19 Supplement):1893-1893. doi:10.1158/1538-7445.AM2014-1893.
4. Hall MJ, Gowen K, Sanford EM, et al. Evaluation of microsatellite instability (MSI) status in 11,573 diverse solid tumors using comprehensive genomic profiling (CGP). *J Clin Oncol*. 2016;34(15\_suppl):1523-1523. doi:10.1200/JCO.2016.34.15\_suppl.1523
5. Bellmunt J, de Wit R, Vaughn DJ, et al. Pembrolizumab as Second-Line Therapy for Advanced Urothelial Carcinoma. *N Engl J Med*. 2017;376:1015-1026.
6. Balar AV, Castellano D, O'Donnell PH, et al. First-line pembrolizumab in cisplatin-ineligible patients with locally advanced and unresectable or metastatic urothelial cancer (KEYNOTE-052): a multicentre, single-arm, phase 2 study. *Lancet Oncol*. 2017;18:1483-1492.



Supplementary Table 1. Comparison of baseline molecular alterations identified in outlier pathologic responders subgroups (N=112 evaluable TURBT samples)

| GENE PATHWAY            | pT0N0<br>(N=42) |      | pT2-4/pN+ or NR<br>(N=47) |      | p-value | Corrected-p* | Odds ratio |
|-------------------------|-----------------|------|---------------------------|------|---------|--------------|------------|
|                         | N               | %    | N                         | %    |         |              |            |
| Cell-cycle regulators** | 25              | 59.5 | 30                        | 63.8 | 0.8     | 1.0          | 0.83       |
| Chromatin remodelling   | 32              | 76.2 | 33                        | 70.2 | 0.6     | 1.0          | 1.36       |
| FGFR1/2                 | 1               | 2.4  | 2                         | 4.3  | 1.0     | 1.0          | 0.55       |
| FGFR3                   | 7               | 16.7 | 6                         | 12.8 | 0.8     | 1.0          | 1.37       |
| HER2/3                  | 11              | 26.2 | 9                         | 19.2 | 0.5     | 0.9          | 1.50       |
| HRD                     | 14              | 33.3 | 9                         | 19.2 | 0.15    | 0.8          | 2.11       |
| PI3K/AKT/MTOR           | 18              | 42.8 | 23                        | 48.9 | 0.7     | 1.0          | 0.78       |
| RAS/RAF/MEK             | 10              | 23.8 | 15                        | 31.9 | 0.5     | 0.9          | 0.67       |

Abbreviations: HRD: homologous recombination defect genes; NR: non responders; TURBT: transurethral resection of the bladder tumor.

\*Bonferroni adjustment was used for multiple hypothesis adjustment.

\*\*RB1 gene alterations alone: corrected p-value=0.91.

## Supplementary Figure 1

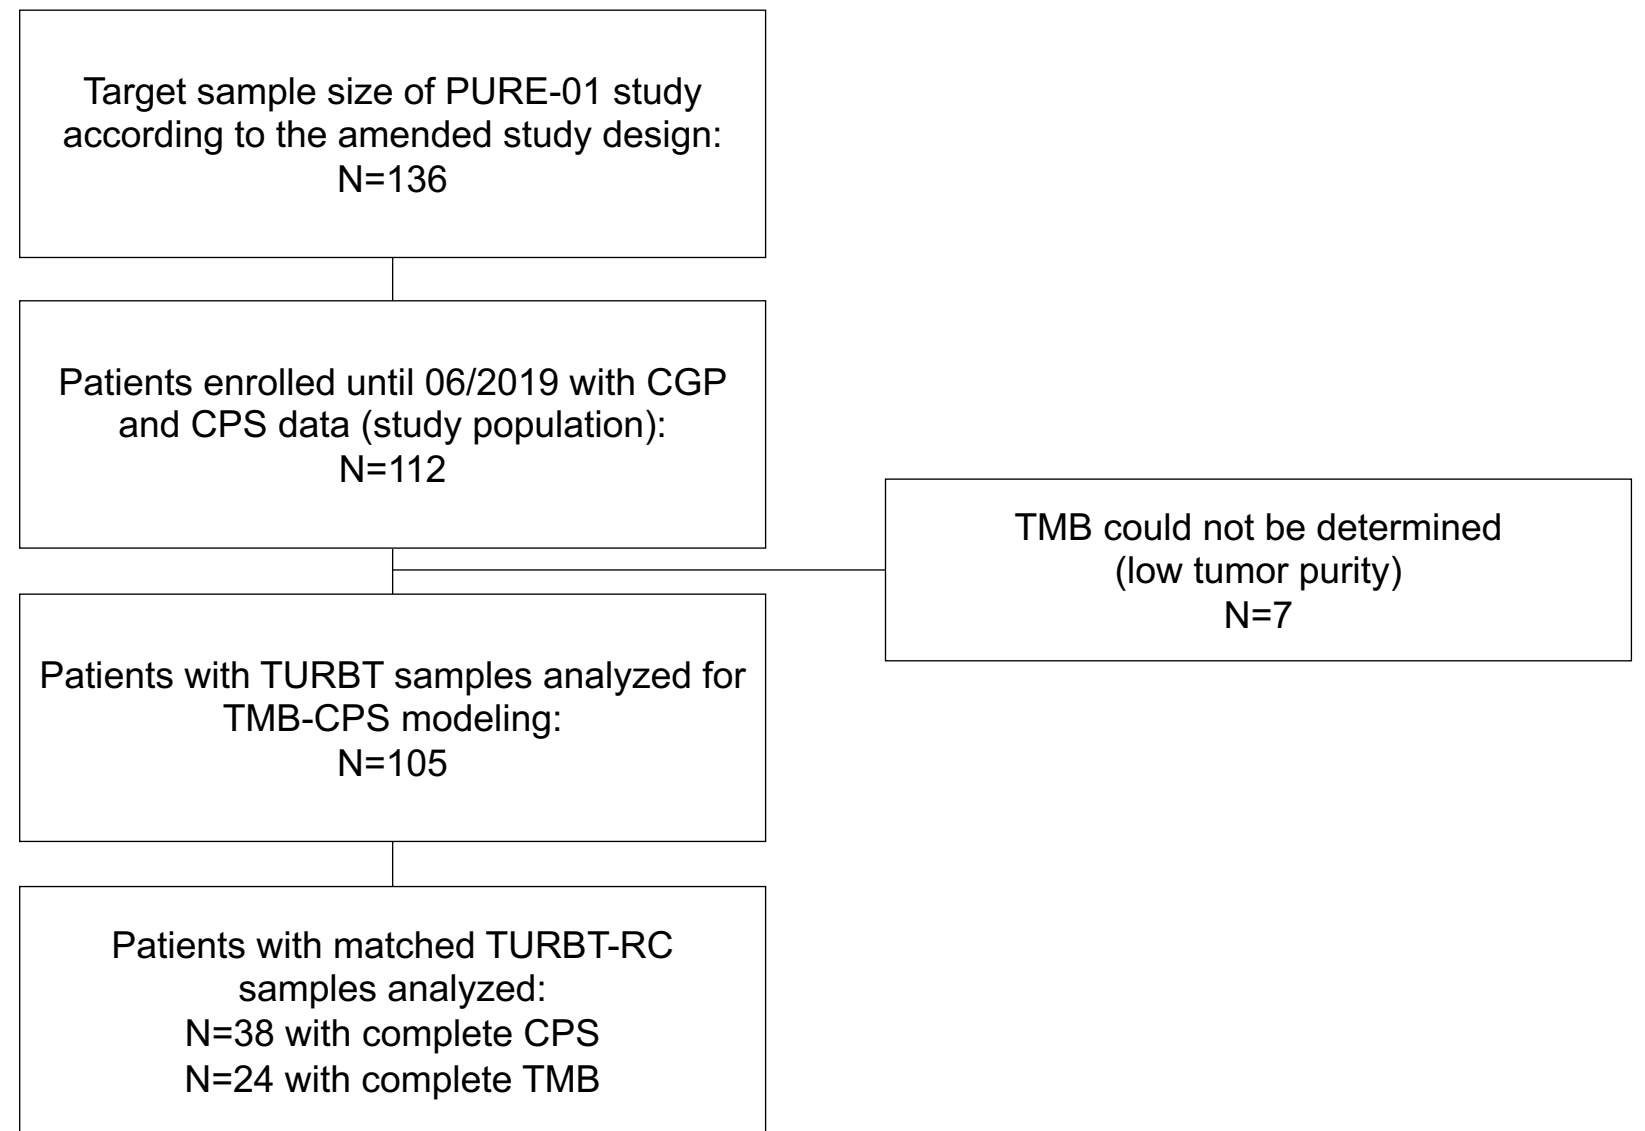

CONSORT diagram.

Abbreviations: CGP: comprehensive genomic profiling; CPS: combined positive score; RC: radical cystectomy; TMB: tumor mutational burden; TURBT: transurethral resection of the bladder tumor.

## Supplementary Figure 2

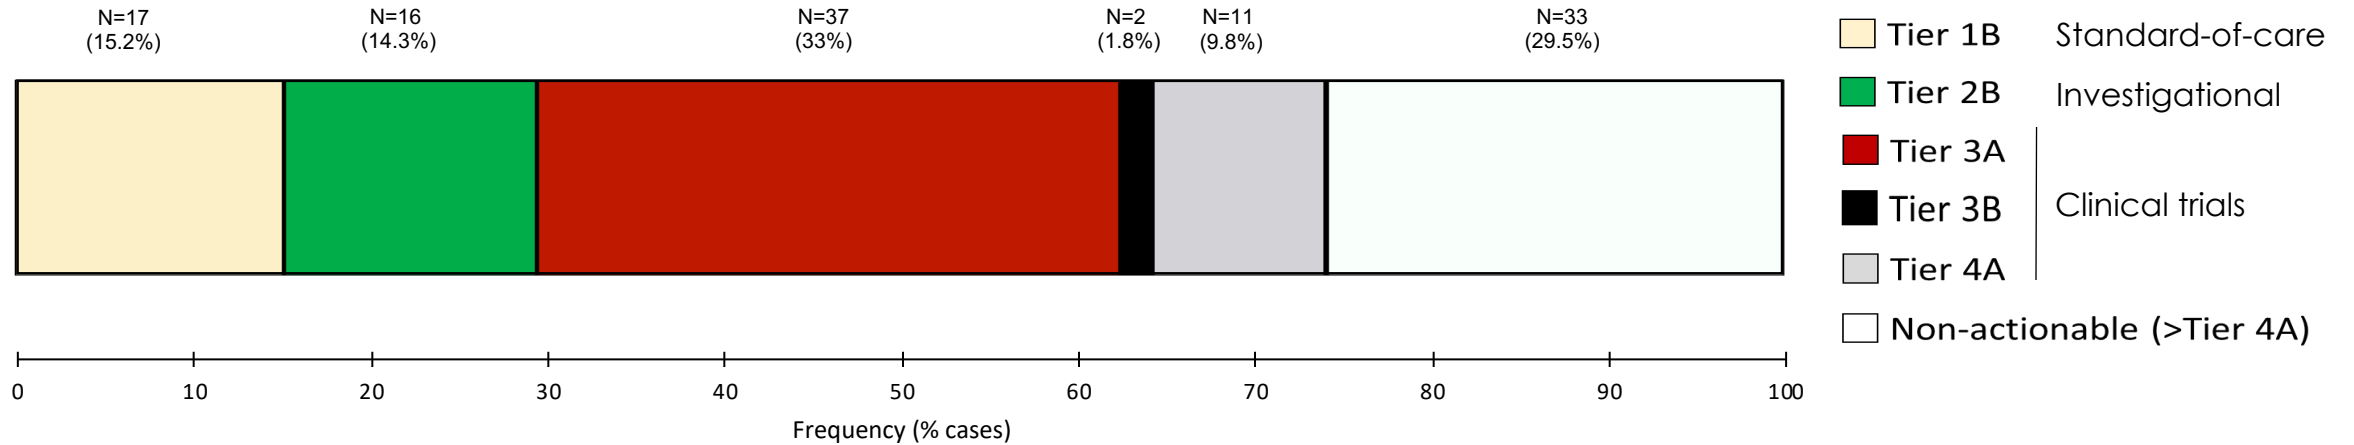

Targetable genomic alterations and signatures identified in PURE-01 samples. Genomic alterations were ranked using the ESCAT actionability scale. Each case was assigned a tier according to the highest ranked genomic alteration/signature. ESCAT rankings were performed without TMB/MSI genomic signatures considered on the actionability scale.

# Supplementary Figure 3

**A**

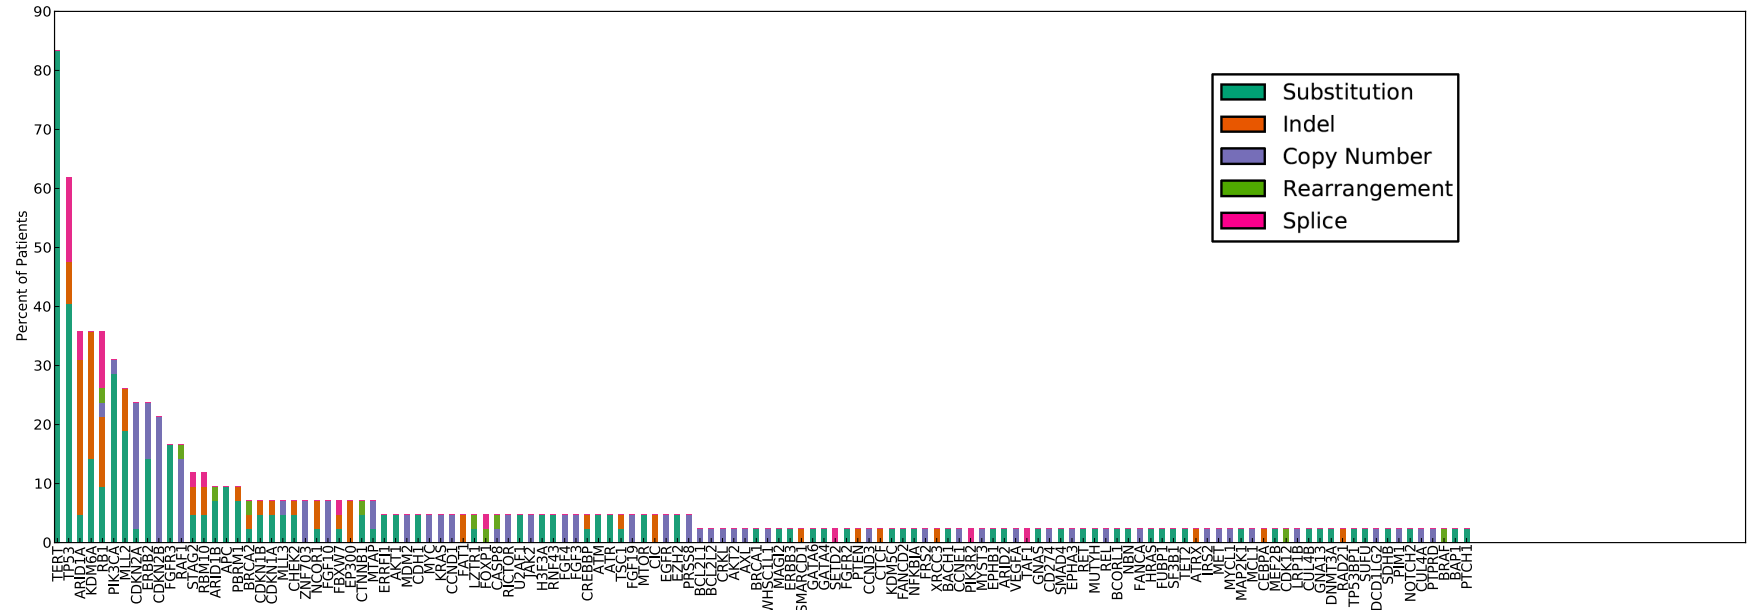

**B**

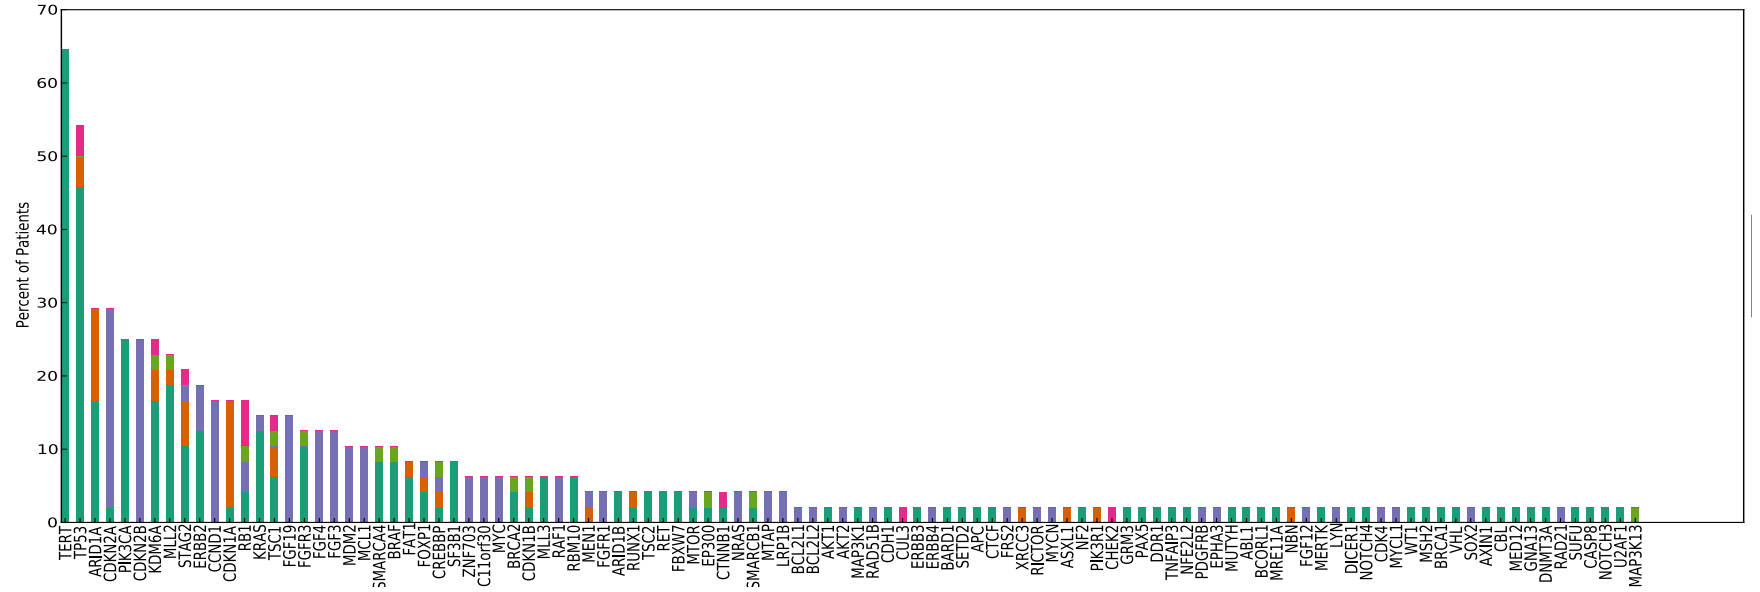

Longtail plot showing the comparison of genomic alterations in pT0N0 responders (A) versus non-responders (pT2-4 and/or pN+ and/or clinically non-responders).

## Supplementary Figure 4

**A**

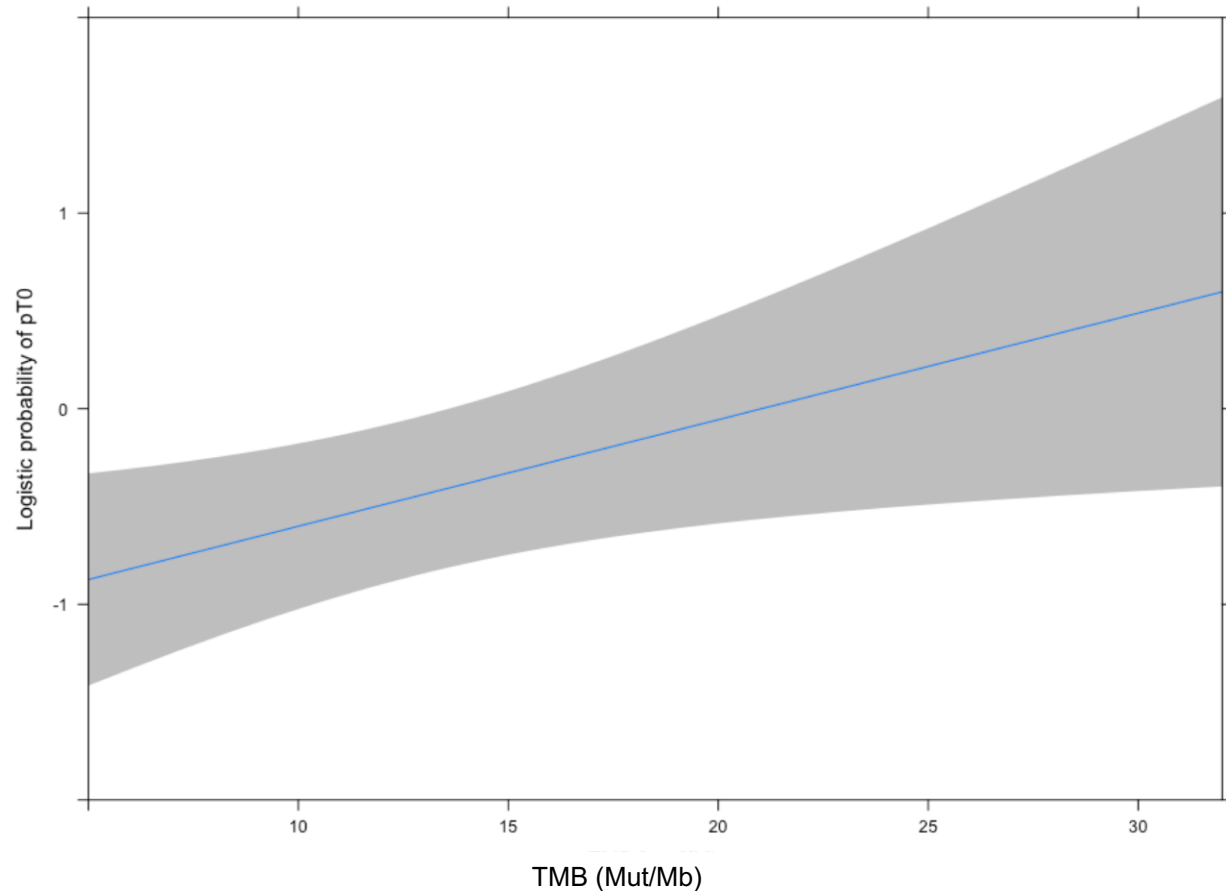

**B**

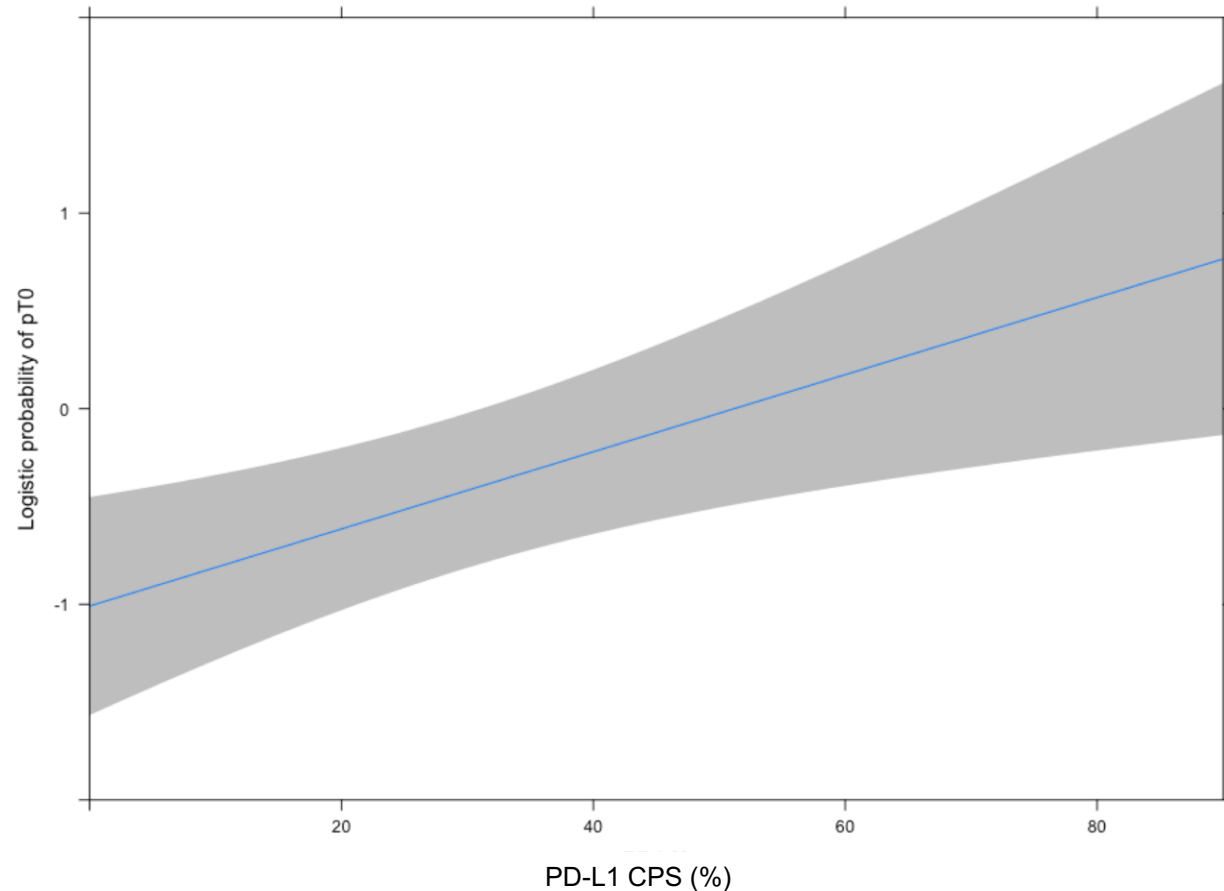

Logarithmic probabilities of pT0N0 — derived from a logistic single-variable model — were plotted according to the continuously coded value of the TMB (A) and CPS (B), respectively.

**Abbreviations:** CPS: combined positive score; PD-L1: programmed cell-death ligand-1; T0: pathologic complete response; TMB: tumor mutational burden.



## Supplementary Figure 5

**A**

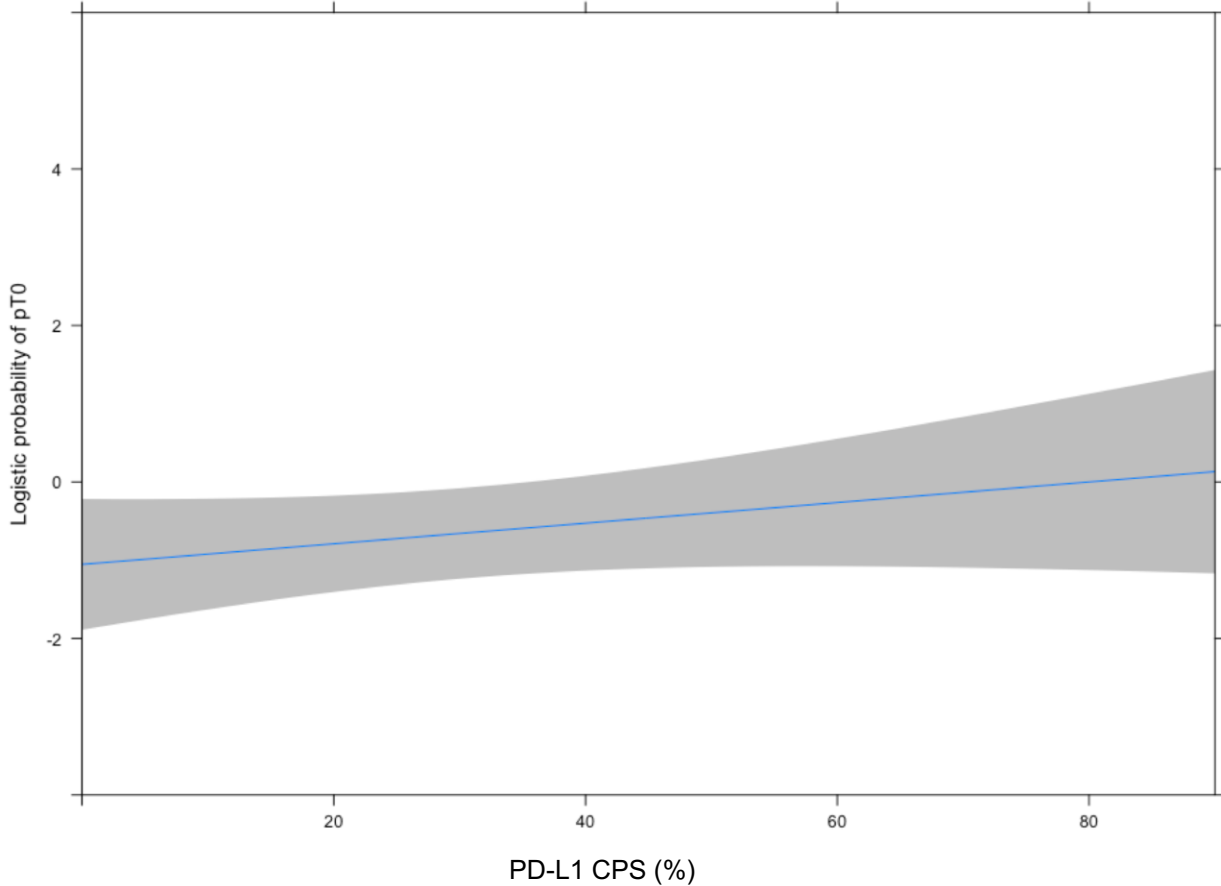

**B**

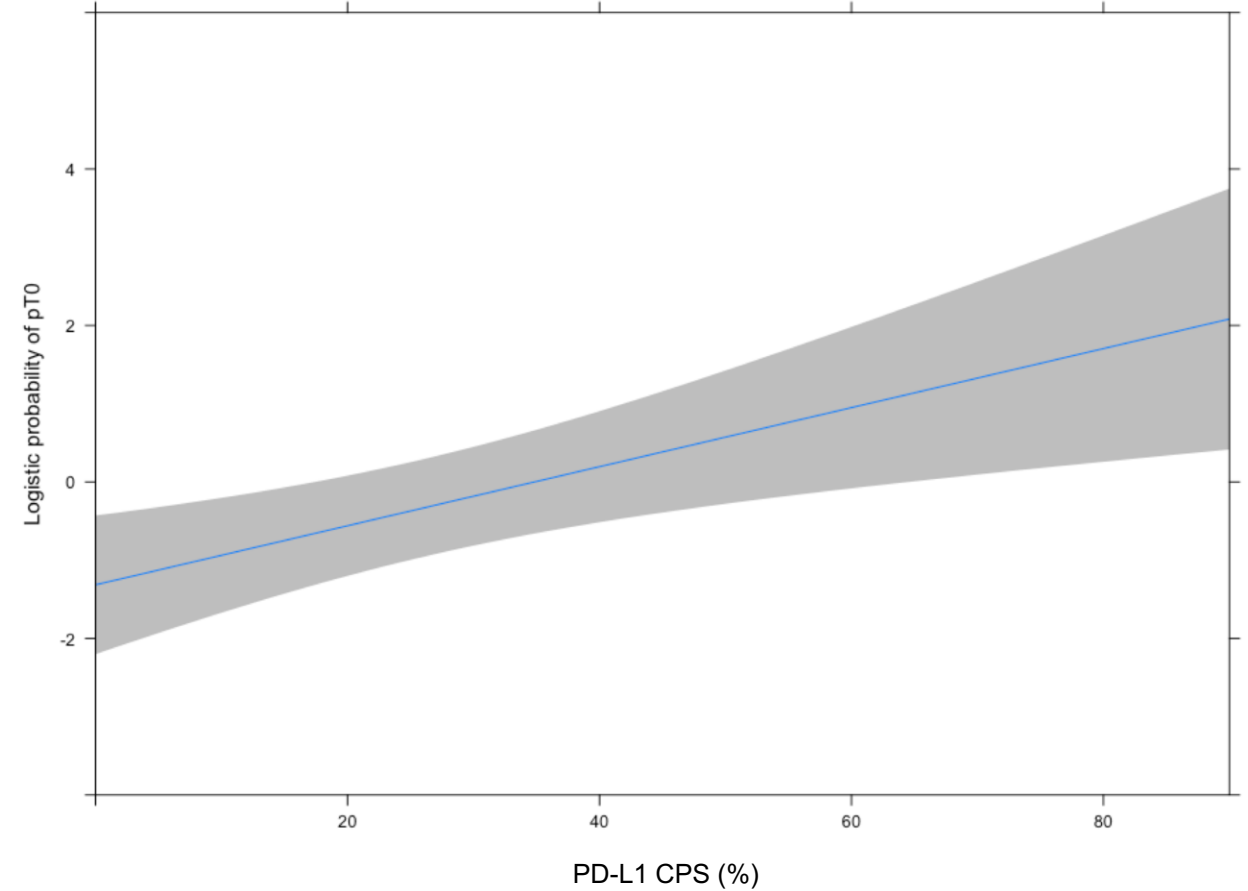

Logarithmic probabilities of pT0N0 — derived from a logistic single-variable model — were plotted according to the continuously coded value of CPS for patients with TMB values below the median ( $\leq 11$  Mut/Mb) (A) and for patients above the median ( $> 11$  Mut/Mb) (B), respectively.

**Abbreviations:** CPS: combined positive score; PD-L1: programmed cell-death ligand-1; T0: pathologic complete response; TMB: tumor mutational burden.

# Supplementary Figure 6

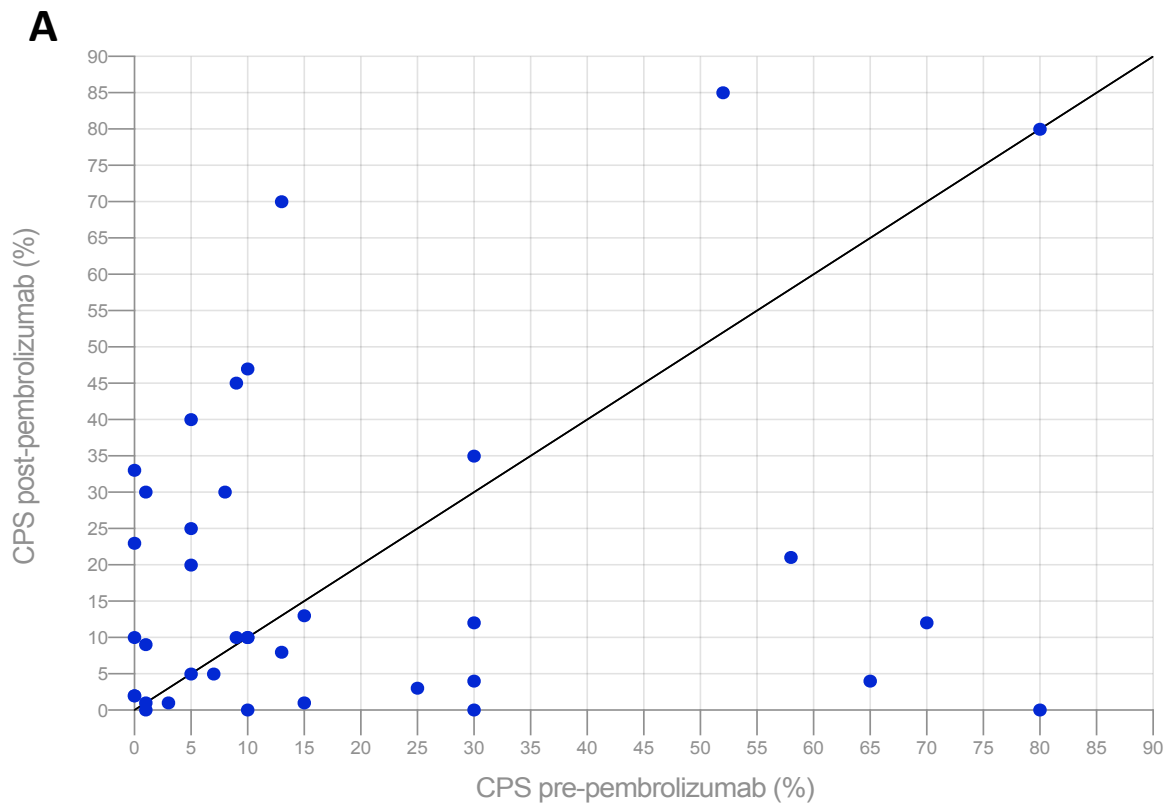

**B**

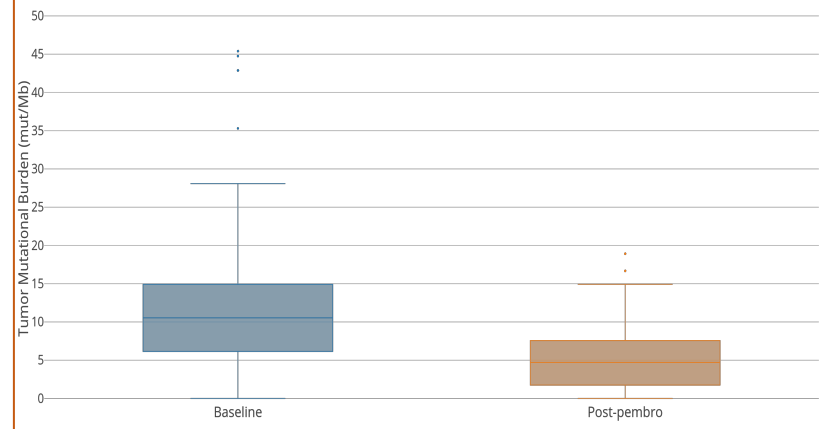

**C**

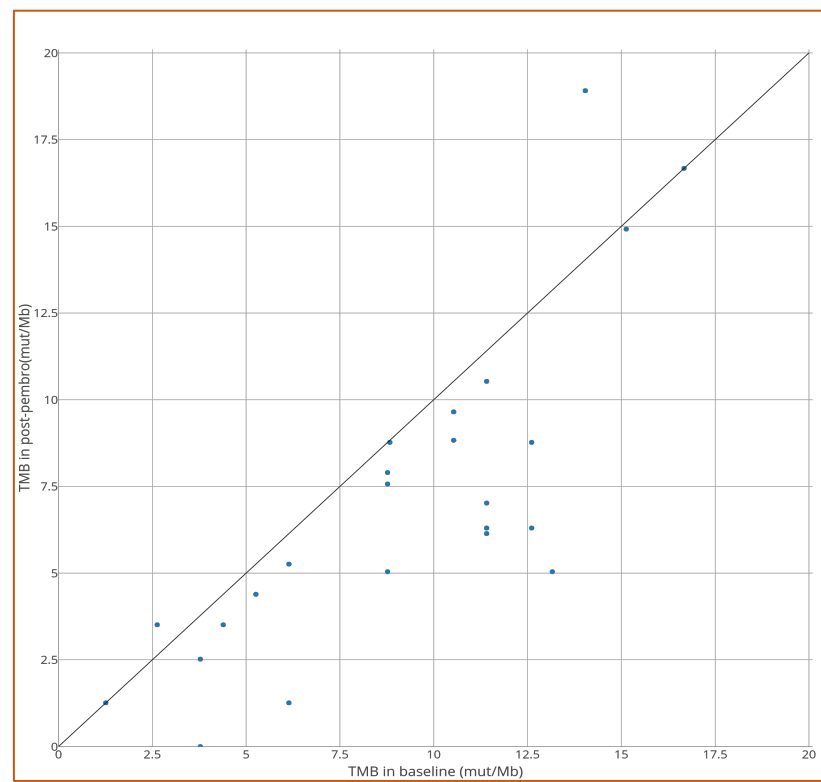

Scatter plot illustrating the matched pre-therapy and post-therapy values of CPS (A) and TMB (B). Linear regression curve is shown in the plot.

Abbreviations: CPS: combined positive score; TMB: tumor mutational burden.
